# Supplementary material for: Bioactive compounds, antibacterial and antioxidant activities of methanol extract of Tamarindus indica Linn
Source: Research Square preprint supplement (doi:10.21203/rs.3.rs-1238883/v1), 2022-02-08
Supplement: Supplementary file 1 [file b1832a00b927386ae6715e70.docx]

**Table 1: Showing the names, chemical structure, molar mass, molecular formulae, and the biological activities of each compound identified by GCMS analysis.**

| **Peak Numbers** | **R. Time** | **Peak Area %** | **Height %** | **A/H** | **Mark Name** | **Chemical formulae** | **Molecular Structure** | **Molecular weight (g/mol)** | **Biological activities** |
| --- | --- | --- | --- | --- | --- | --- | --- | --- | --- |
| 1 | 5.727 | 0.14 | 0.32 | 4.28 | 1-(2-furanyl)-Ethanone | C6H6O2 | 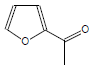 | 110 | Antioxidant and antifungal agent32 |
| 2 | 5.932 | 0.4 | 1.54 | 2.62 | 2(5H)-Furanone | C4H4O2 | 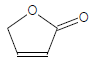 | 84 | Antimicrobial agent33 |
| 3 | 6.043 | 0.3 | 0.88 | 3.46 | 2-ethyl-2-Butenal | C6H10O | 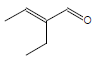 | 98 | Not reported |
| 4 | 6.21 | 0.75 | 2.31 | 3.27 | 5-methyl-2(5H)-Furanone | C5H6O2 | 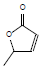 | 98 | Flavoring agent, antifungal and antibacterial34 |
| 5 | 6.251 | 0.27 | 1.42 | 1.9 | N-cyclohexylidene-Methanamine, | ‎C7H13N | 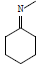 | 111 | Anticonvulsant agent35 |
| 6 | 6.379 | 3.2 | 8.17 | 3.93 | 5-methyl-2-Furancarboxaldehyde | C6H6O2 | 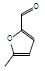 | 110 | Fungicide and nematicide, antibacterial, antiinflammatory, Proteinase inhibitor36 |
| 7 | 6.451 | 0.57 | 1.89 | 3.02 | 1,4,5-trimethyl-imidazole | C6H10N2 | 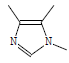 | 110 | Carcinogenic37 |
| 8 | 6.584 | 0.57 | 1.72 | 3.36 | 1-(3-thienyl)-ethanone | C6H6OS | 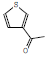 | 126 | Antifungal, antitubercular, and anticancer activities38 |
| 9 | 6.653 | 0.87 | 4.37 | 1.99 | 2,4-Dihydroxy-2,5-dimethyl-3(2H)-furan-3 | ‎C6H8O4 | 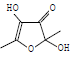 | 144 | Antibacterial and antifungal activities Flavoring39 |
| 10 | 6.69 | 0.42 | 1.79 | 2.35 | 4-oxo-methyl ester-pentanoic acid | C6H10O3 | 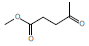 | 130 | Antioxidant and antimicrobial agent40 |
| 11 | 6.957 | 1.17 | 1.41 | 8.31 | Triethylenediamine | C6H12N2 | 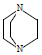 | 112 | Herbicidal and antibacterial41 |
| 12 | 7.483 | 0.53 | 1.77 | 3 | Benzeneacetaldehyde | C8H8O | 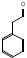 | 120 | Antioxidant, mutagenic, and antimicrobial42 |
| 13 | 8.194 | 2.18 | 3.97 | 5.52 | 1-(2-furanyl)-1-propanone | C7H8O2 | 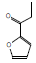 | 124 | Antibacterial43 |
| 14 | 8.272 | 3.14 | 4.13 | 7.63 | Methyl 2-furoate | C6H6O3 | 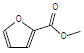 | 126 | Biofilm inhibitors, Antifungal, Antioxidant activity44 |
| 15 | 8.723 | 3.21 | 3.78 | 8.52 | Levoglucosenone | C6H6O3 | 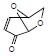 | 126 | Anticancer and antitumor activity45 |
| 16 | 9.281 | 8.85 | 11.32 | 7.84 | methyl ester-Hepta-2,4-dienoic acid | C8H12O2 | 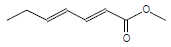 | 140 | Antioxidant activity46 |
| 17 | 9.417 | 3.4 | 3.19 | 10.69 | 2,3-dihydro-3,5-dihydroxy-4H-pyran-4-one | ‎C5H6O4 | 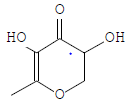 | 130 | Antibiofilm, Melanin production inhibitor, Antioxidant, Antimicrobial activity47 |
| 18 | 10.302 | 1.05 | 1.64 | 6.39 | 3-Methyl-2-furoic acid | 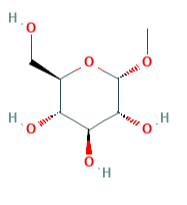C6H6O3 | 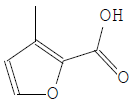 | 126 | Bactericidal, fungicidal and nematocidal agent48 |
| 19 | 11.175 | 31.06 | 8.74 | 35.66 | 5-Hydroxymethylfurfural | C6H603 | 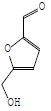 | 126 | Antioxidant, antimicrobial, Antiproliferative, Antibiofilm49 |
| 20 | 11.388 | 0.42 | 0.69 | 6.16 | 3-(hydroxymethyl)-6-2-C  cyclohexen-1-one | C7H10O2 | 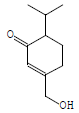 | 126 | Not reported |
| 21 | 11.952 | 1.29 | 1.61 | 8.05 | 2-Heptanol, acetate | C9H18O2 | 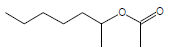 | 158 | Ovicidal and lavicidal50 |
| 22 | 12.406 | 0.47 | 0.53 | 8.9 | O-α-D-glucopyranosyl-(1.fwdarw.3)-β-D-fructofuranosyl-α-D-Glucopyranoside | C18H32O16 | 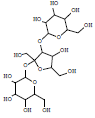 | 504 | Anti-diabetic, anti-hyperlipidemic, anti-oxidant activity51 |
| 23 | 12.838 | 0.47 | 1.11 | 4.25 | 5-(2-furanylmethyl 2-furancarboxaldehyde | C10H8O3 | 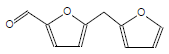 | 176 | Antimicrobial52 |
| 24 | 13.612 | 0.3 | 0.75 | 4.01 | 3,5-Dimethyl-1H-pyrazol-4-yl)acetic acid | C7H11N3O2 | 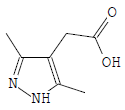 | 154 | Herbicidal and antimicrobial53 |
| 25 | 13.744 | 1.08 | 3.68 | 2.95 | 5-[(5-methyl-2-furanyl)-methyl2-furancarboxaldehyde | C6H6O2 | 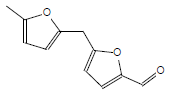 | 190 | fungicide and nematicide54 |
| 26 | 14.803 | 9.95 | 2.91 | 34.25 | 1,6-anhydro-β-D-glucopyranose | C6H10O5 | 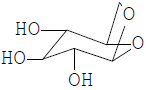 | 162 | Human metabolites, biomarkers, anti-human immunodeficiency virus, and blood  anti-coagulant55 |
| 27 | 15.573 | 2.18 | 1.52 | 14.34 | O-α-D-glucopyranosyl-(1.fwdarw.3)-β-D-fructofuranosyl-α-D-glucopyranoside | C18H32O16 | 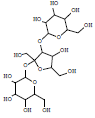 | 504 | Anticonvulsant, antioxidant, antitumor, antibactetria56 |
| 28 | 16.885 | 16.31 | 5.43 | 30.12 | 3-O-Methyl-d-glucose | C7H14O6 | 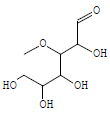 | 194 | Preservatives, anti-inflammatory, and antitumor agent57,58 |
| 29 | 17.21 | 1.38 | 5.19 | 2.68 | n-Hexadecanoic acid | ‎C16H32O2 | 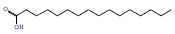 | 256 | Nematicide, Hemolytic, Anti-androgenic, Antidiabetic Hypocholesterolemic, Anti-oxidant and pesticidal59 |
| 30 | 17.508 | 0.28 | 0.97 | 2.89 | 9-oxabicyclo[6.1.0]non-6-en-2-one | C8H10O2 | 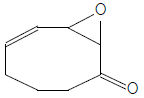 | 138 | Unknown |
| 31 | 17.702 | 0.32 | 0.48 | 4.54 | 2-(hydroxymethyl)-cyclohexanone | C7H12O2 | 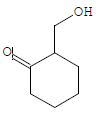 | 128 | Antibacterial activities60 |
| 32 | 18.052 | 0.38 | 2.19 | 1.76 | methyl ester, (Z)-7-hexadecenoic acid | C17H32O2 | 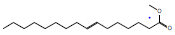 | 268 | Antimicrobial and antioxidant61 |
| 33 | 18.368 | 2.35 | 6.68 | 3.53 | cis-Vaccenic acid | C18H34O2 | 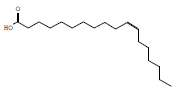 | 283 | Antimicrobial62 |
| 34 | 18.459 | 0.09 | 0.67 | 1.31 | Octadecanoic acid | C18H36O2 | 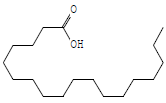 | 285 | Anticancer and antibacterial activity63 |
| 35 | 20.534 | 0.11 | 0.48 | 2.17 | 2-hydroxy-1-(hydroxymethyl)ethyl ester-hexadecanoic acids | [C19H38O4](https://pubchem.ncbi.nlm.nih.gov/#query=C19H38O4) | 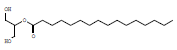 | 330 | Antioxidant, antimicrobial, Flavoring agent, 5-Alpha reductase-inhibitor, Pesticide, Antifibrinolytic, and Hemolytic agent64 |
| 36 | 21.796 | 0.55 | 0.52 | 10.61 | (Z)-2,3-dihydroxypro-9-octadecenoic acid | C21H40O4 | 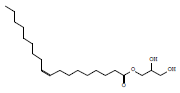 | 357 | Flavoring agent, Lubricant, Antioxidant, Larvicidal, and analgesic activities65 |
| 37 | 22.229 | 0.12 | 0.22 | 5.45 | β-Sitosterol | C29H50O | 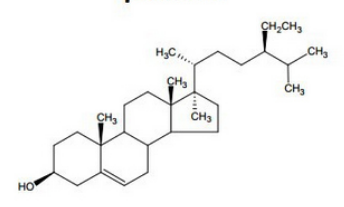 | 414 | Antimicrobial, Antioxidant anti-inflammatory, antidiabetic, Immunomodulatory,Anthelminthic and Anti-mutagenic Activities66 |
